# Supplementary material for: Synthesis of [Fe(Leq)(Lax)]ncoordination polymer nanoparticles using blockcopolymer micelles
Source: publisher site journal article supplement (doi:10.3762/bjnano.8.133), 2017-06-26
Supplement: Additional file 1 [file 2190-4286-8-133-S1.pdf]

# Supporting Information

for

## **Synthesis of $[\text{Fe}(\text{L}_{\text{eq}})(\text{L}_{\text{ax}})]_n$ coordination polymer nanoparticles using blockcopolymer micelles**

Christoph Göbel<sup>1</sup>, Ottokar Klimm<sup>1</sup>, Florian Puchtler<sup>2</sup>, Sabine Rosenfeldt<sup>3</sup>,  
Stephan Förster<sup>3</sup> and Birgit Weber<sup>\*1</sup>

Address: <sup>1</sup>Inorganic Chemistry II, University of Bayreuth, Universitätsstr. 30, 95440 Bayreuth, Germany; <sup>2</sup>Inorganic Chemistry I, University of Bayreuth, Universitätsstr. 30, 95440 Bayreuth, Germany and <sup>3</sup>Physical Chemistry I and Bavarian Polymer Institute, University of Bayreuth, Universitätsstr. 30, 95440 Bayreuth, Germany

Email: Birgit Weber\* - [weber@uni-bayreuth.de](mailto:weber@uni-bayreuth.de)

\* Corresponding author

## **Additional experimental data**

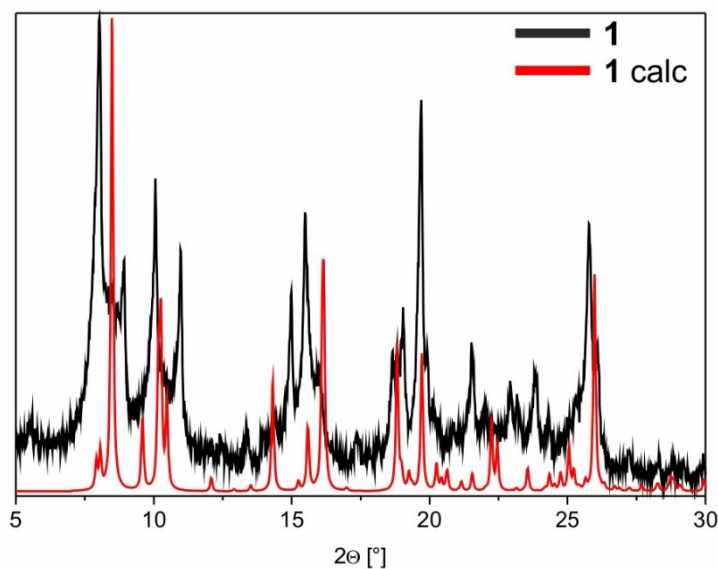

**Figure S1:** Comparison of the powder X-ray diffraction pattern of  $[\text{Fe}(\text{L}_{\text{eq}})(\text{bpea})]_n$  (**1**) and  $\{[\text{Fe}(\text{L}_{\text{eq}})(\text{bpea})] \cdot 0.25 \text{ MeOH}\}_n$  (synthesised in methanol, calculated from single crystal data) [1].

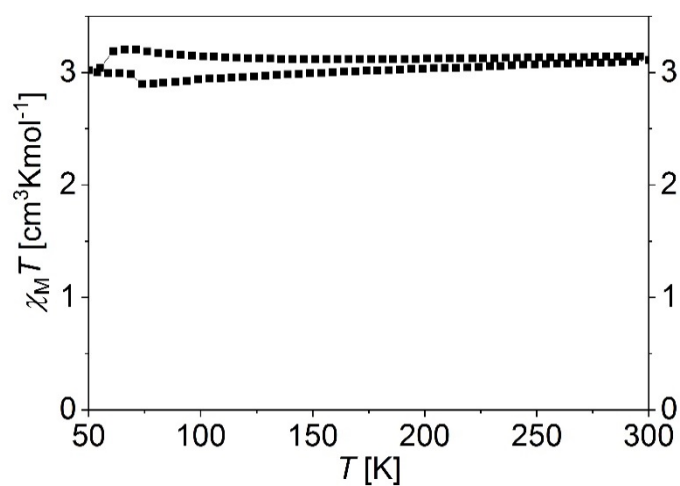

**Figure S2:** Plot of the  $\chi_M T$  product versus temperature for **2**.

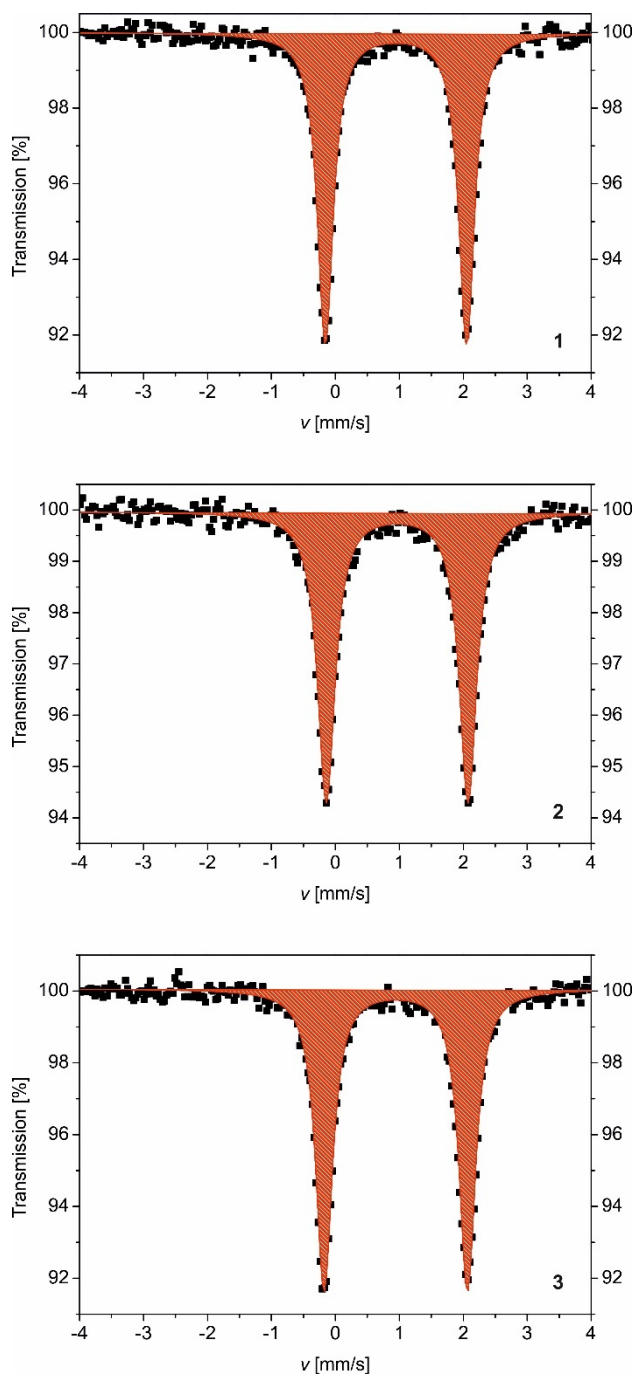

**Figure S3:** Mössbauer spectra of **1** (top), **2** (centre) and **3** (bottom). In each case one single doublet is observed with Mössbauer parameters (Table S1) characteristic for an iron(II) HS complex.

**Table S1:** Mössbauer parameters of the samples **1**, **2** and **3**.

| sample   | site      | $\delta$ [mm/s] | $\Delta E_Q$ [mm/s] | $\Gamma$ [mm/s] | Area [%] |
|----------|-----------|-----------------|---------------------|-----------------|----------|
| <b>1</b> | Fe(II) HS | 0.947(3)        | 2.210(6)            | 0.147(5)        | 100      |
| <b>2</b> | Fe(II) HS | 0.966(4)        | 2.216(7)            | 0.164(6)        | 100      |
| <b>3</b> | Fe(II) HS | 0.944(3)        | 2.240(6)            | 0.156(5)        | 100      |

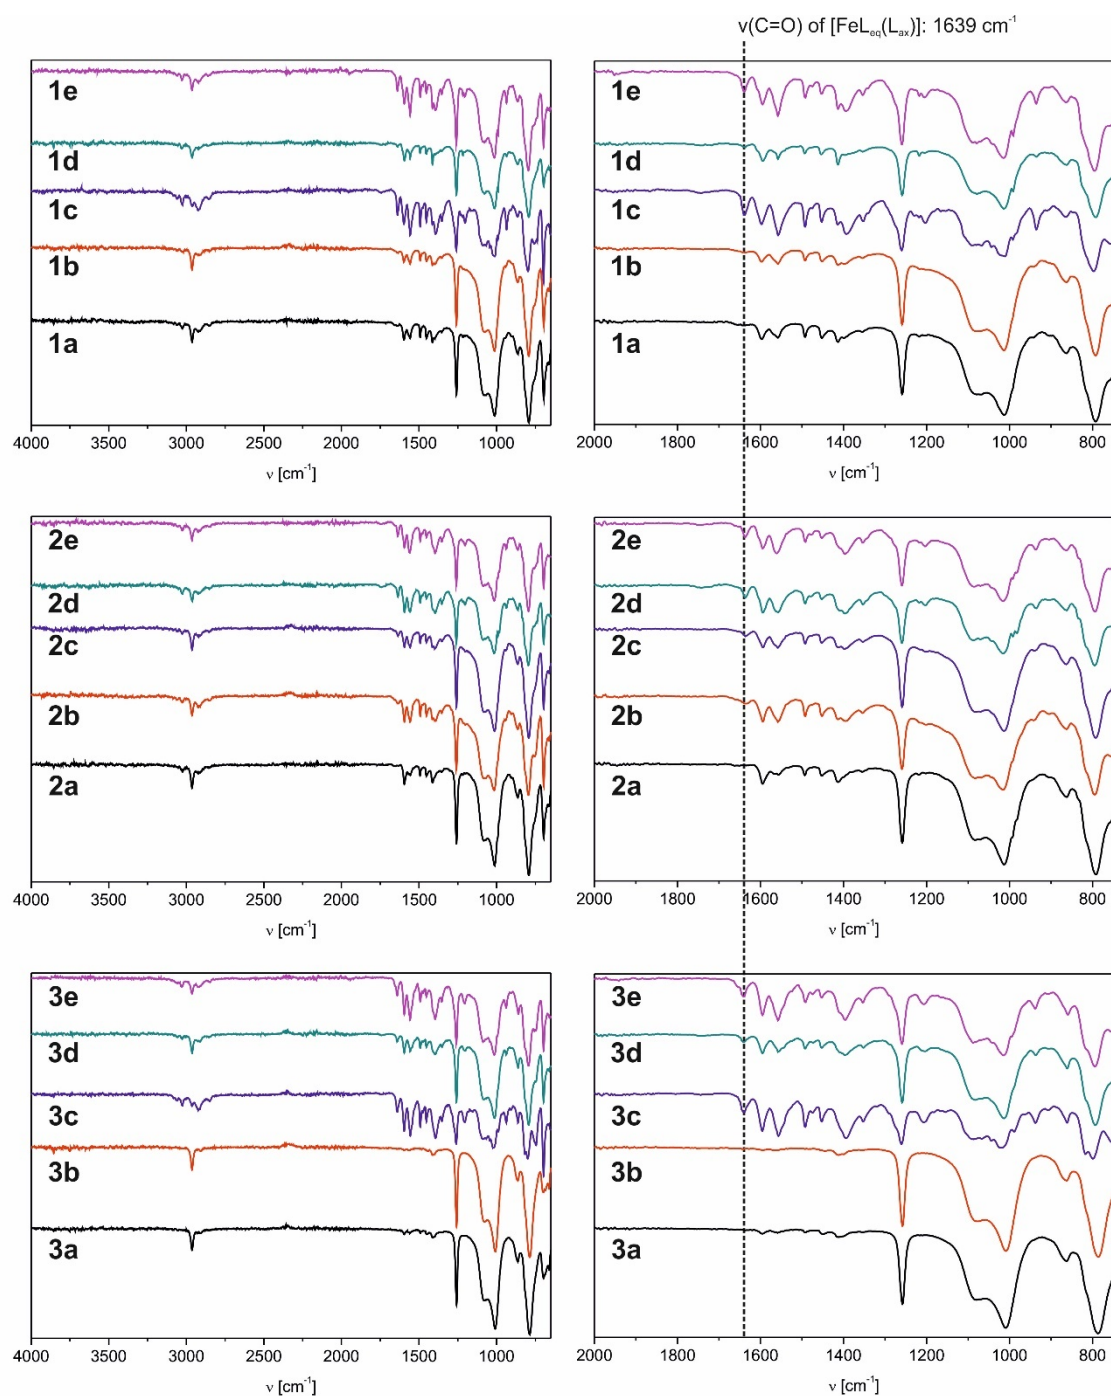

**Figure S4:** IR spectra of **1a–e** (top left), **2a–e** (centre left) and **3a–e** (bottom left) and the relevant area between 2000 and 750  $\text{cm}^{-1}$  to show the C=O vibration band the samples **1a–e** (top right), **2a–e** (centre right) and **3a–e** (bottom right).

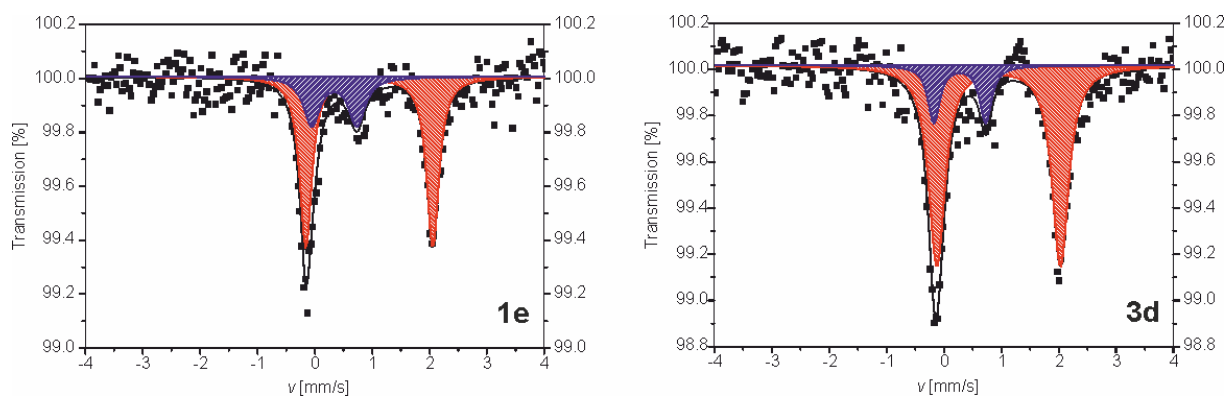

**Figure S5:** Mössbauer spectra of **1e** (left) and **3d** (right). The red doublet corresponds to an iron(II) HS species and the blue doublet corresponds to an iron(II) LS species. The Mössbauer parameters are given in Table S2.

**Table S2:** Mössbauer parameters of the samples **1d**, **1e**, **3d** and **3e**.

| sample    | site      | $\delta$ [mm/s] | $\Delta E_Q$ [mm/s] | $\Gamma$ [mm/s] | Area [%] |
|-----------|-----------|-----------------|---------------------|-----------------|----------|
| <b>1d</b> | Fe(II) LS | 0.28(11)        | 0.65(18)            | 0.24(14)        | 26(9)    |
|           | Fe(II) HS | 0.951(14)       | 2.21(3)             | 0.132(19)       | 74(9)    |
| <b>1e</b> | Fe(II) LS | 0.34(6)         | 0.79(12)            | 0.17(8)         | 28(9)    |
|           | Fe(II) HS | 0.951(14)       | 2.21(3)             | 0.12(2)         | 72(9)    |
| <b>3d</b> | Fe(II) LS | 0.28(6)         | 0.90(12)            | 0.12(6)         | 17(6)    |
|           | Fe(II) HS | 0.95(2)         | 2.15(4)             | 0.17(2)         | 83(9)    |
| <b>3e</b> | Fe(II) HS | 0.958(12)       | 2.17(2)             | 0.161(18)       | 100      |

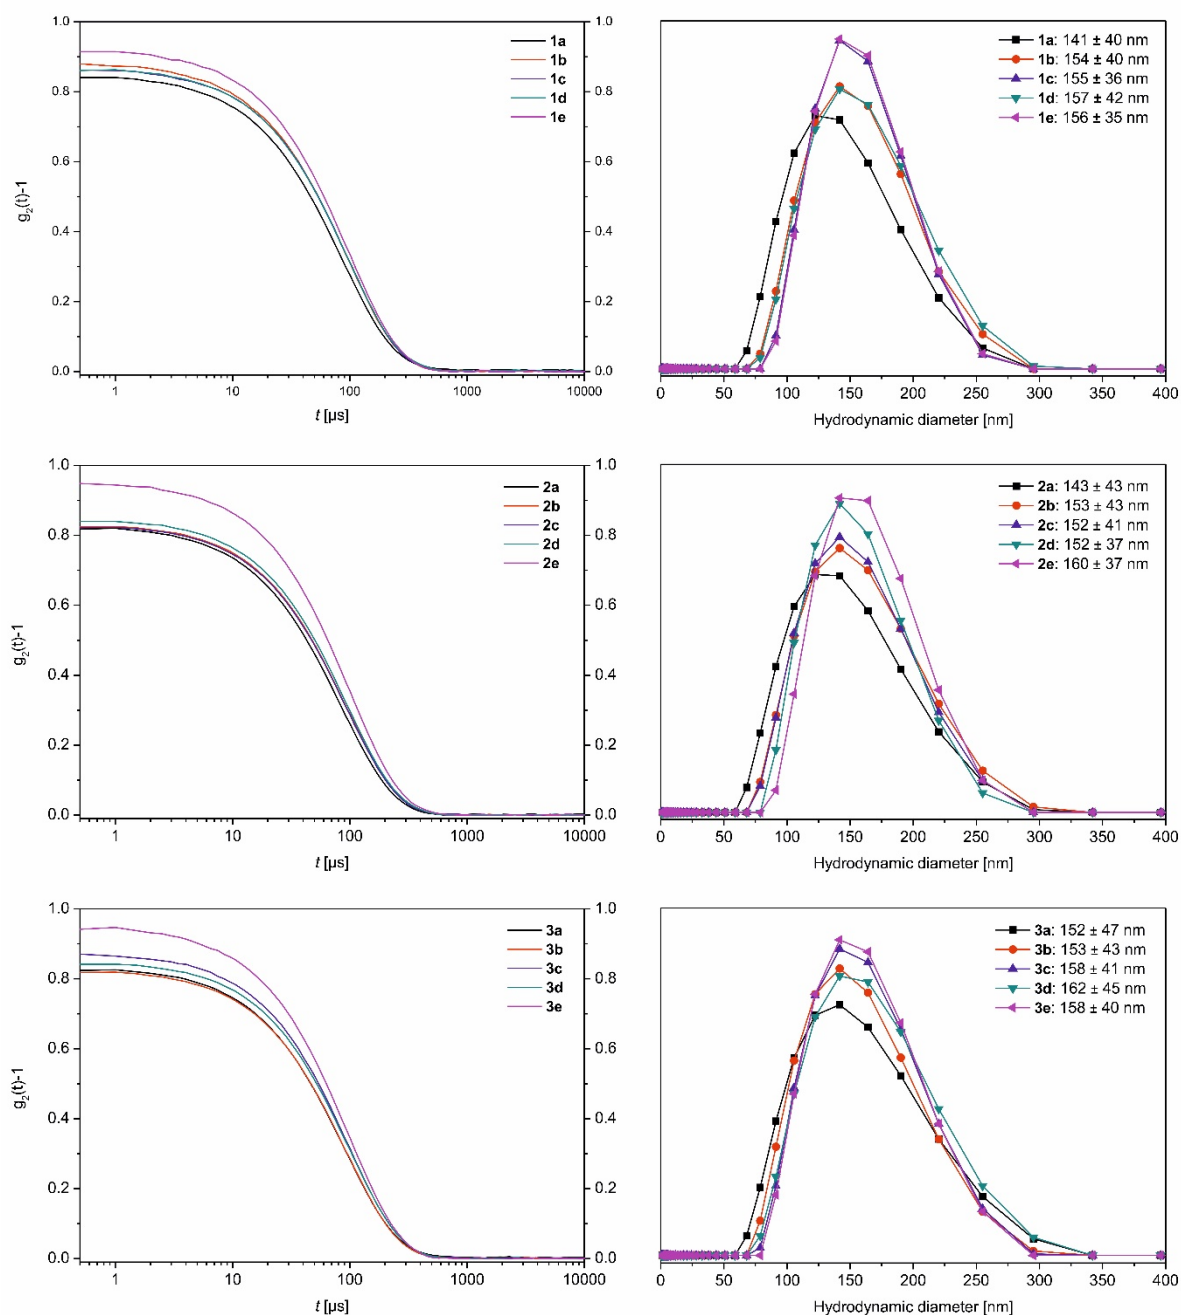

**Figure S6:** DLS measurement of the nanocomposites in THF, 43 wt %. Correlation functions of **1a–e** (top left), **2a–e** (centre left) and **3a–e** (bottom left) and the resulting hydrodynamic diameter of the polymeric micelles in THF of **1a–e** (top right), **2a–e** (centre right) and **3a–e** (bottom right).



**Table S3:** Summarised characterisation for the different composite samples (**1a–3e**). An exemplary TEM picture and the size distribution are given for TEM measurements. The particle sizes are given in the pictures.

| sample    | Reaction conditions   | TEM nanoparticles, TEM size distribution, TEM microcrystals (if any) and Mössbauer spectra (if any). |                                                                                      |
|-----------|-----------------------|------------------------------------------------------------------------------------------------------|--------------------------------------------------------------------------------------|
| <b>1a</b> | 1 cycle, THF, reflux  | 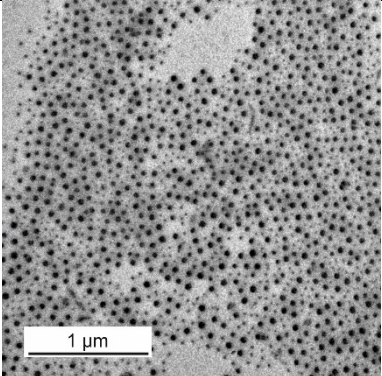                    |    |
| <b>1b</b> | 2 cycles, THF, reflux |                    |   |
| <b>1c</b> | 3 cycles, THF, reflux |                   |  |
| <b>1d</b> | 4 cycles, THF, reflux |                   |  |

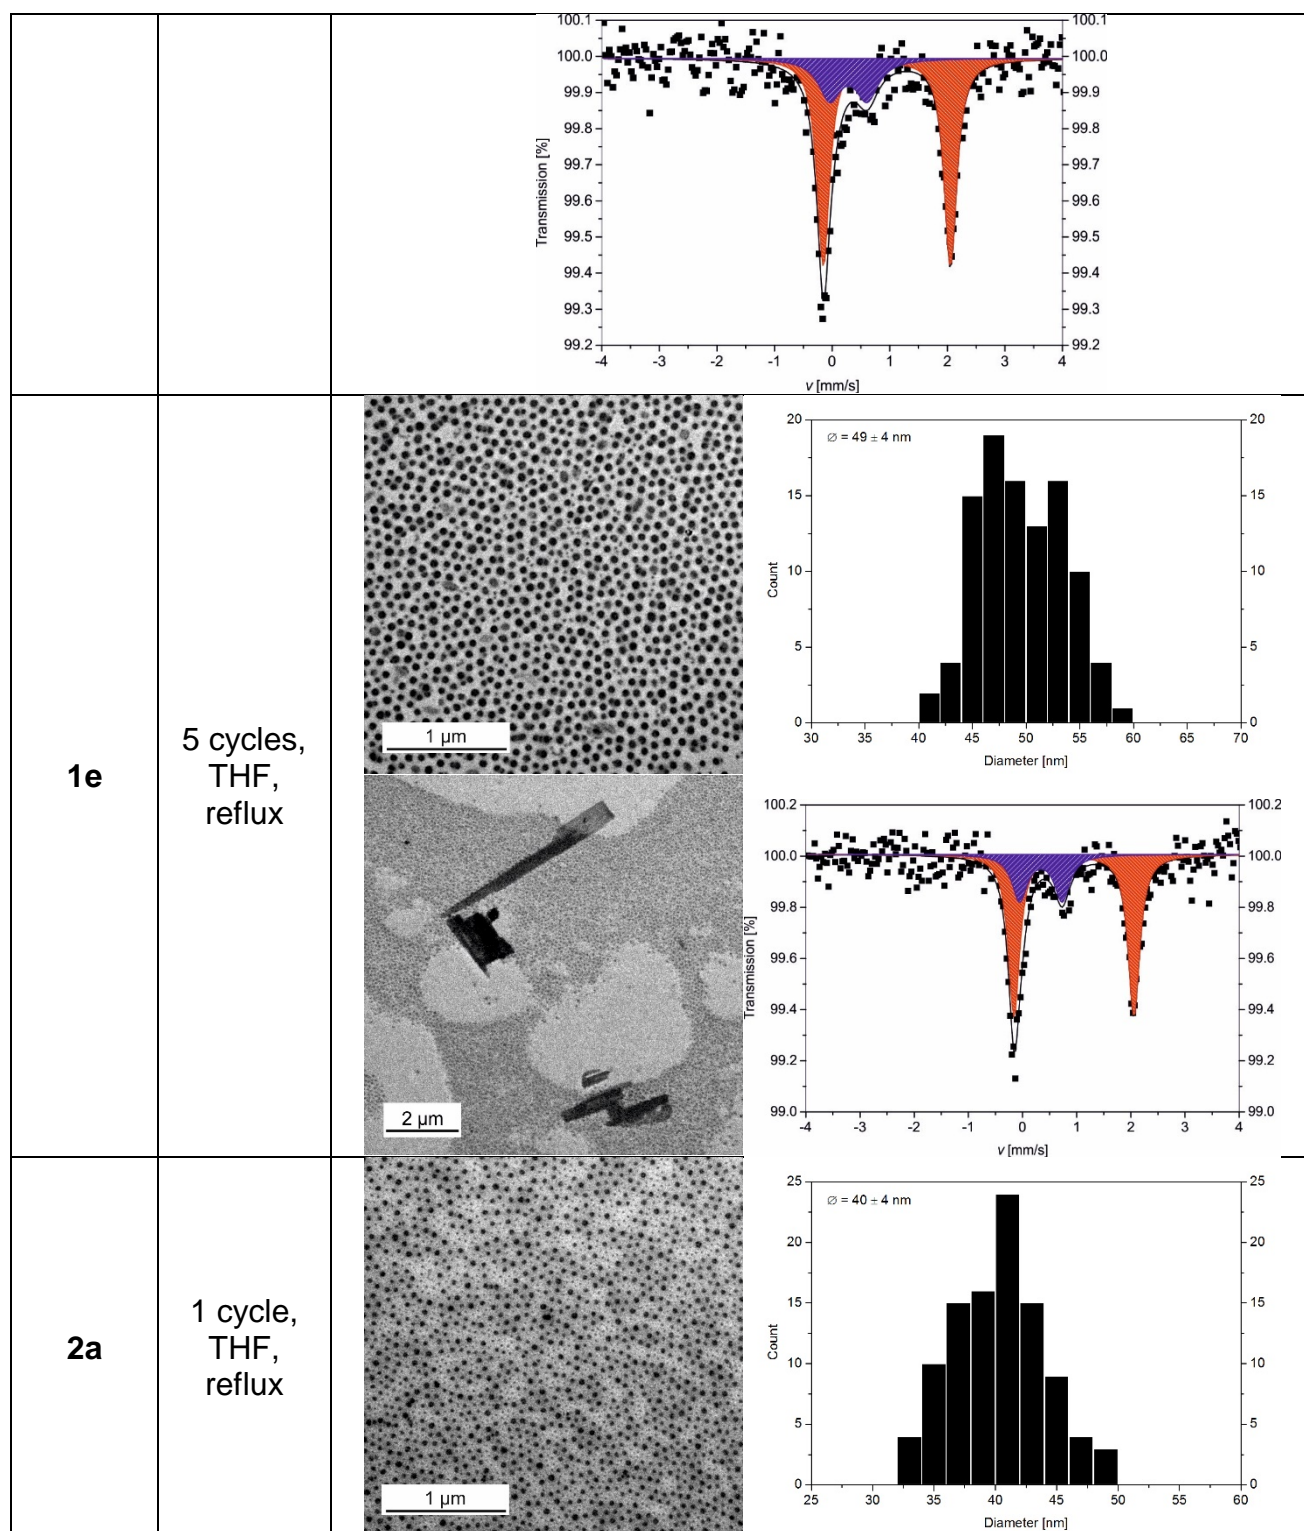



|    |                       |                                                                                                                                                                         |                                                                                                                                          |
|----|-----------------------|-------------------------------------------------------------------------------------------------------------------------------------------------------------------------|------------------------------------------------------------------------------------------------------------------------------------------|
| 2b | 2 cycles, THF, reflux | 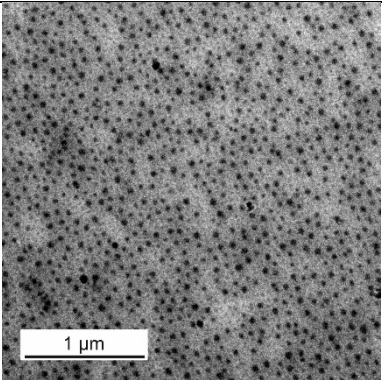                                                                                       |  <p><math>\bar{\phi} = 46 \pm 5 \text{ nm}</math></p>  |
| 2c | 3 cycles, THF, reflux |                                                                                        |  <p><math>\bar{\phi} = 42 \pm 4 \text{ nm}</math></p>  |
| 2d | 4 cycles, THF, reflux |   |  <p><math>\bar{\phi} = 48 \pm 4 \text{ nm}</math></p> |

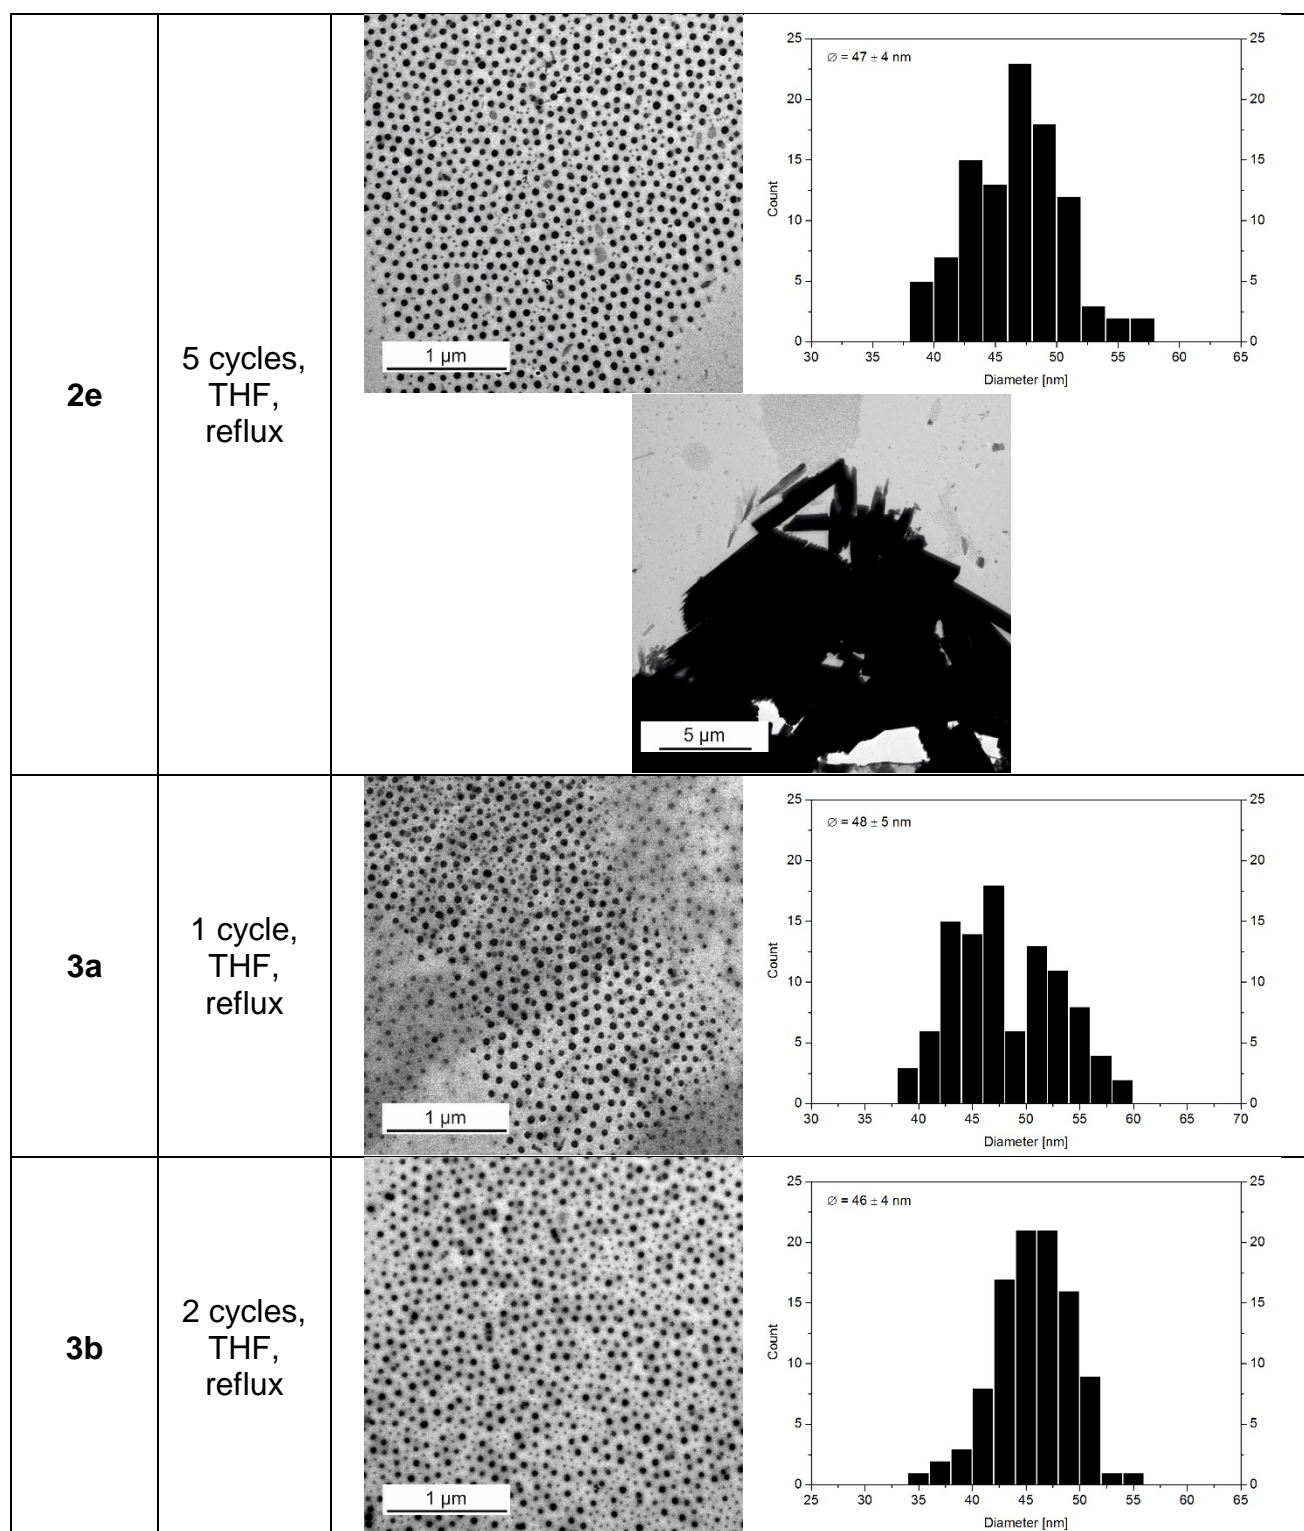

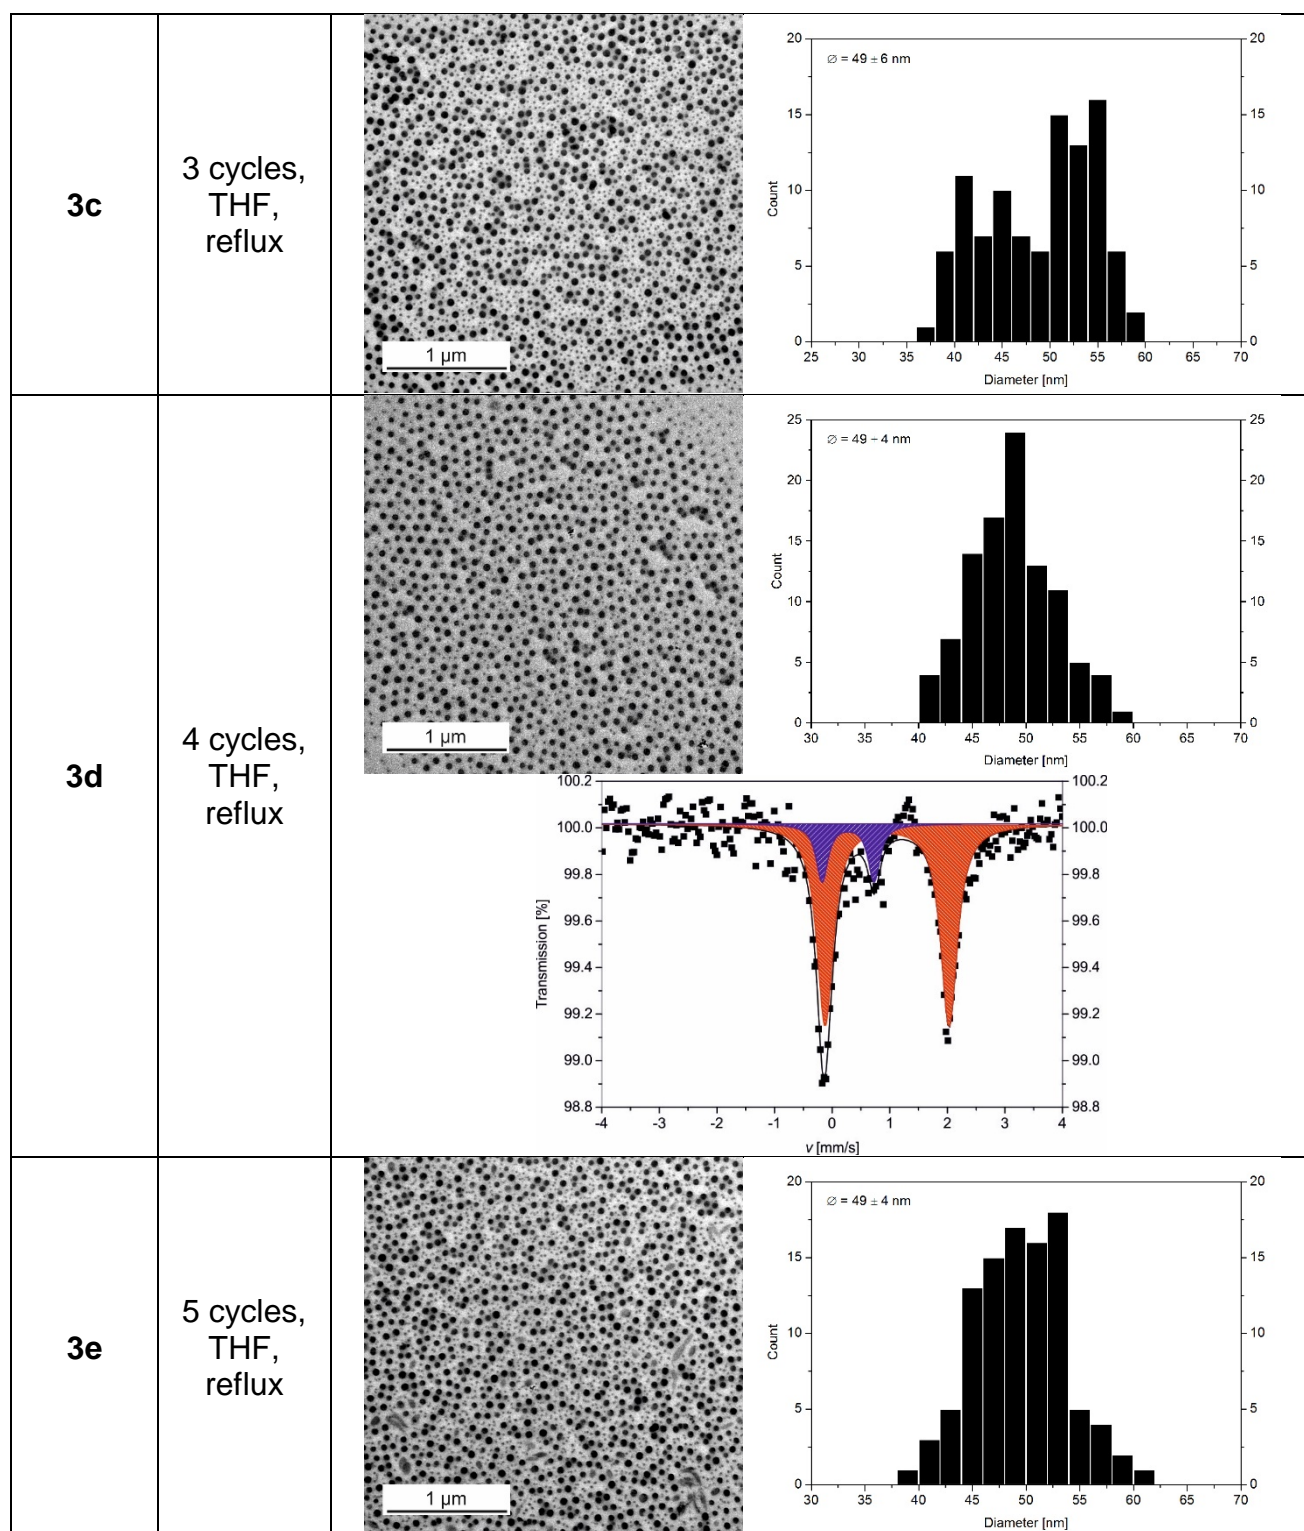

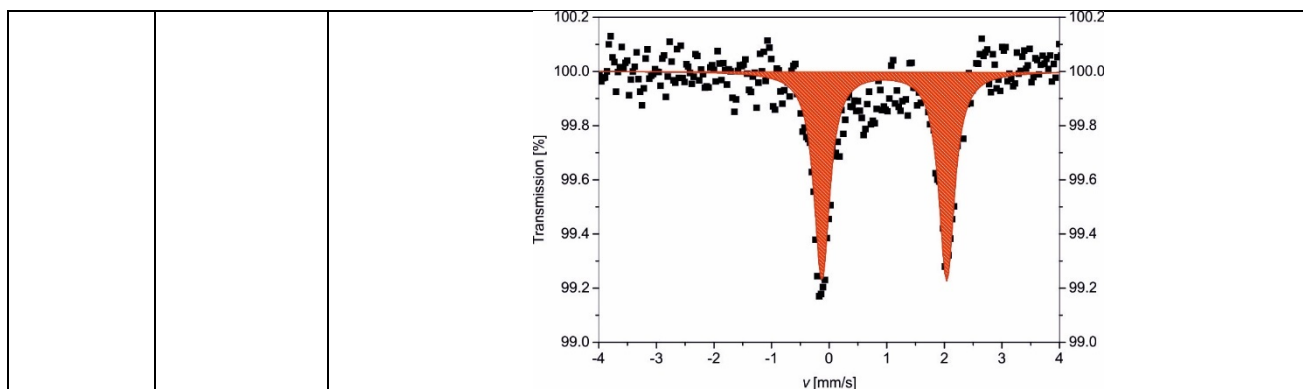

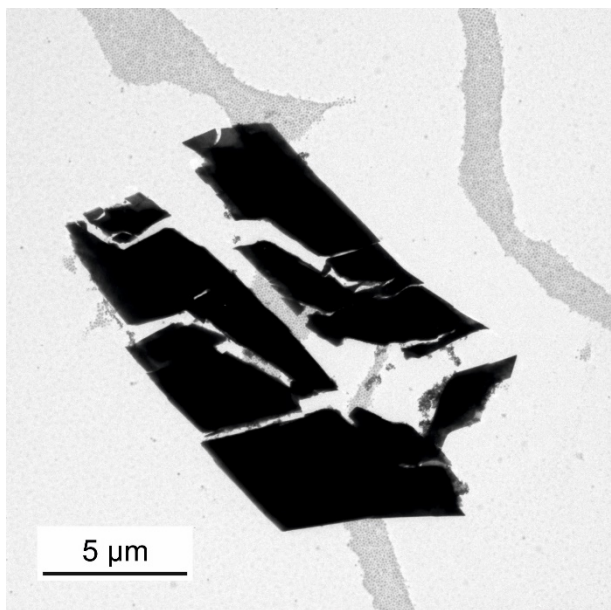

**Figure S7:** Exemplary TEM picture of  $[\text{FeL}_{\text{eq}}(\text{bpea})]_n\text{@BCP}$  after two cycles synthesised in toluene to show microcrystals of the coordination polymer.



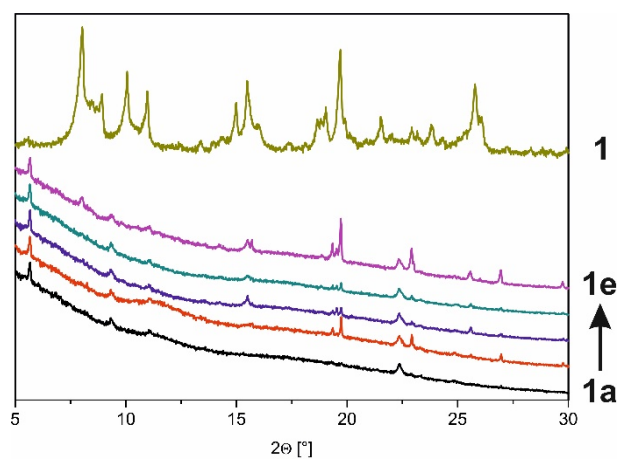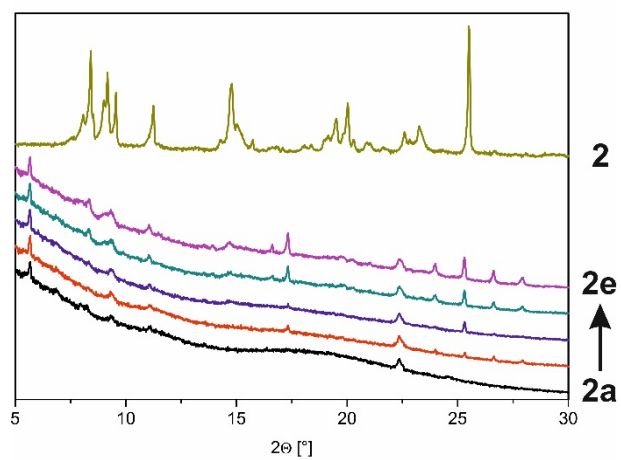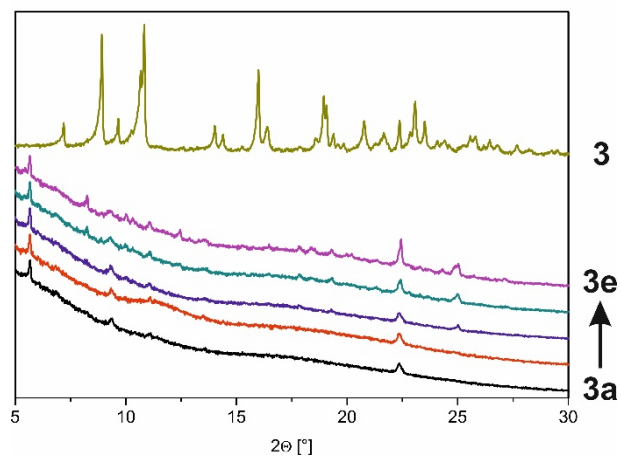

**Figure S8:** Powder X-ray diffraction pattern of **1** and **1a–e** (top), **2** and **2a–e** (centre) and **3** and **3a–e** (bottom).



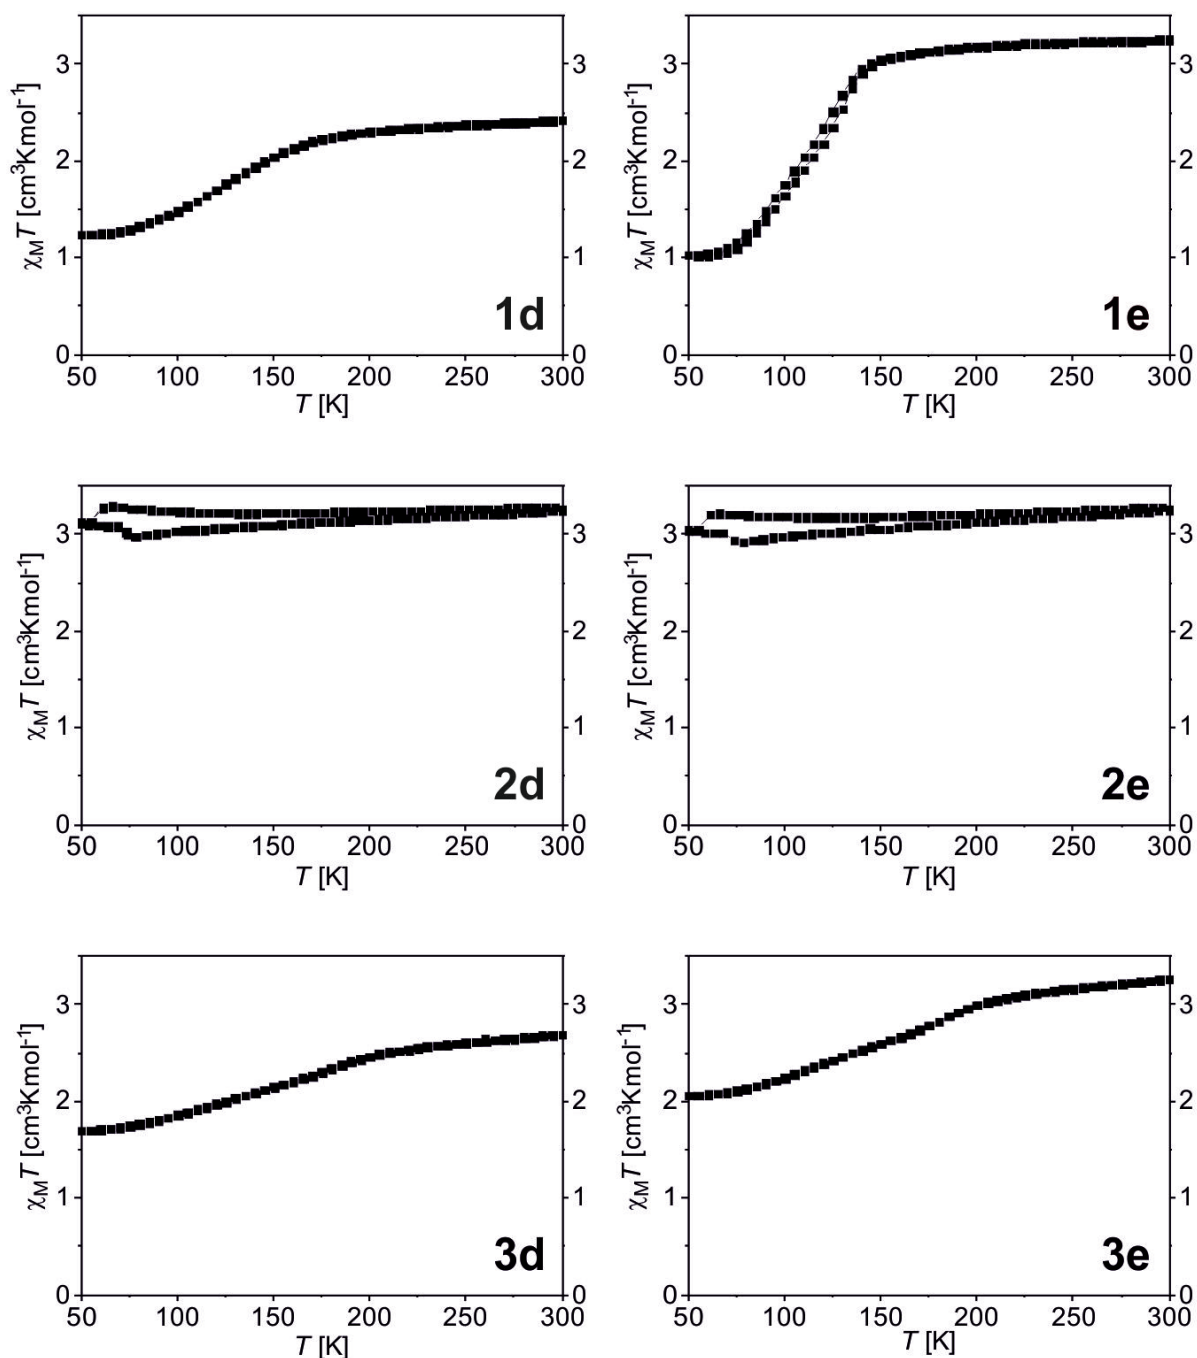

**Figure S9:**  $\chi_M T$  vs  $T$  plots of the samples **1d** (top left), **1e** (top right), **3d** (bottom left) and **3e** (bottom right). The results for the samples **2d** (centre left) to **2e** (centre right) are identical to the bulk material  $[\text{FeL}_{\text{eq}}(\text{bpee})]_n$ ; the  $\chi_M T$  product is constant in the temperature region investigated and no indication for spin crossover is observed. This is not surprising, as relatively large microcrystals are observed.

## References

1. Bauer, W.; Scherer, W.; Altmannshofer, S.; Weber, B. *Eur. J. Inorg. Chem.* **2011**, 2011, 2803–2818. doi:10.1002/ejic.201001363
